# Supplementary material for: Probiotic Lactobacillus sp. Strains Inhibit Growth, Adhesion, Biofilm Formation, and Gene Expression of Bacterial Vaginosis-Inducing Gardnerella vaginalis
Source: PubMed Central journal article supplement (PMC8065998; doi:10.3390/microorganisms9040728), 2021-03-31
Supplement: microorganisms-09-00728-s001.pdf [file microorganisms-09-00728-s001.pdf]

# Probiotic *Lactobacillus* sp. strains inhibit growth, adhesion, biofilm formation and gene expression of bacterial vaginosis-inducing *Gardnerella vaginalis*

Zhixiang Qian<sup>1,2,3</sup>, Hui Zhu<sup>1</sup>, Dan Zhao<sup>1</sup>, Ping Yang<sup>1</sup>, Fei Gao<sup>1</sup>, Chunyi Lu<sup>1</sup>, Yu Yin<sup>1</sup>, Shidong Kan<sup>1</sup>, and Daijie Chen<sup>1,2\*</sup>

**Supplementary Table 1** Primer sequences used for RT-qPCR assay.

<sup>a</sup>*vly*, HMPREF0424\_0103, encoding athiol-activated cholesterol-dependent cytolysin, vaginolysin; *sld*, HMPREF0424\_1190, encoding glycosyl hydrolase family 25, sialidase; *pat*, HMPREF0424\_0125, encoding flp pilus-assembly TadE/G-like family protein; *gtf*, HMPREF0424\_0821, encoding glycosyltransferase, group 2 family protein; *stp*, HMPREF0424\_1297, encoding sugar ABC transporter permease; *atm*, HMPREF0424\_1253, encoding ABC transporter permease; *itm*, HMPREF0424\_1189, encoding glycosyltransferase, group 2 family protein; *bcrA*, HMPREF0424\_0156, encoding bacitracin transport ATP-binding protein BcrA; *mds*, HMPREF0424\_1122, encoding Multidrug resistance ABC transporter; 16s GV rRNA, 16s ribosomal RNA gene sequence.

<sup>b</sup>16s gene was used as an internal control in the *Gardnerella vaginalis* gene experiment.

<sup>c</sup>IL-8, interleukin-8

<sup>d</sup>GAPDH, glyceraldehyde-3-phosphate dehydrogenase, was used as the housekeeping gene

<sup>e</sup>Fw, Forward primer, Rv, Reverse primer

| Target Gene <sup>a</sup> | Primer sequence (5' to 3') <sup>c</sup> | T <sub>melting</sub> (°C) | Amplicon size (bp) |
|--------------------------|-----------------------------------------|---------------------------|--------------------|
| <i>vly</i>               | Fw CTCGCATGCAGTACGATTCT                 | 58                        | 187                |
|                          | Rv TCTGGTGCATCAACGCTTAC                 | 58                        |                    |
| <i>sld</i>               | Fw GGGTTTATGCACACGCTTTT                 | 56                        | 131                |
|                          | Rv GAAAATGCAGACAACGCAGA                 | 58                        |                    |
| <i>pat</i>               | Fw GGTTCTGGCACTATGCTTGG                 | 58.9                      | 171                |
|                          | Rv ACACGCATTATCCTCCATCC                 | 57.45                     |                    |
| <i>gff</i>               | Fw CAACGAAGGCATAGGTTTCC                 | 59.57                     | 156                |
|                          | Rv GCGCTTGGAAGTCTTTAAC                  | 60.02                     |                    |
| <i>stp</i>               | Fw TGGCTGTTATTGCTATCTACTTCA             | 57.1                      | 203                |
|                          | Rv CTTCCAGAATACTTGCCACTTTGT             | 59.9                      |                    |
| <i>atm</i>               | Fw AGCAGCAATAACTGTAATGGTAATA            | 56.1                      | 155                |
|                          | Rv CAGACTTTTCTTCTCTAGCAACTCC            | 58.5                      |                    |
| <i>itm</i>               | Fw AGTGCTGCTGCCGTCTAT                   | 59.1                      | 75                 |
|                          | Rv TCTGGAAGTGCCGCTTAA                   | 59.1                      |                    |
| <i>bcrA</i>              | Fw CCGACCGCATACTATTTTG                  | 60.34                     | 178                |
|                          | Rv GCAAGACGGTCTCCAAACTC                 | 59.85                     |                    |
| <i>mds</i>               | Fw CAGCACCTGTAGCTCCAACA                 | 60.05                     | 195                |
|                          | Rv TGGCTCAAGAGATTGTGTGC                 | 59.99                     |                    |
| 16s GV rRNA <sup>b</sup> | Fw TGAGTAATGCGTGACCAACC                 | 55.2                      | 167                |
|                          | Rv AGCCTAGGTGGGCCATTACC                 | 59.3                      |                    |
| IL-8 <sup>c</sup>        | Fw TGGCAGCCTTCCTGATTCT                  | 59.3                      | 61                 |
|                          | Rv TTAGCACTCCTTGGCAAACTG                | 59.38                     |                    |
| GAPDH <sup>d</sup>       | Fw AACGGATTGGTCGTATTG                   | 53.40                     | 214                |
|                          | Rv GCTCCTGGAAGATGGTGAT                  | 56.48                     |                    |

### Supplementary Figure S1 Time-dependent auto-aggregation rate of the three tested

*Lactobacillus* sp.

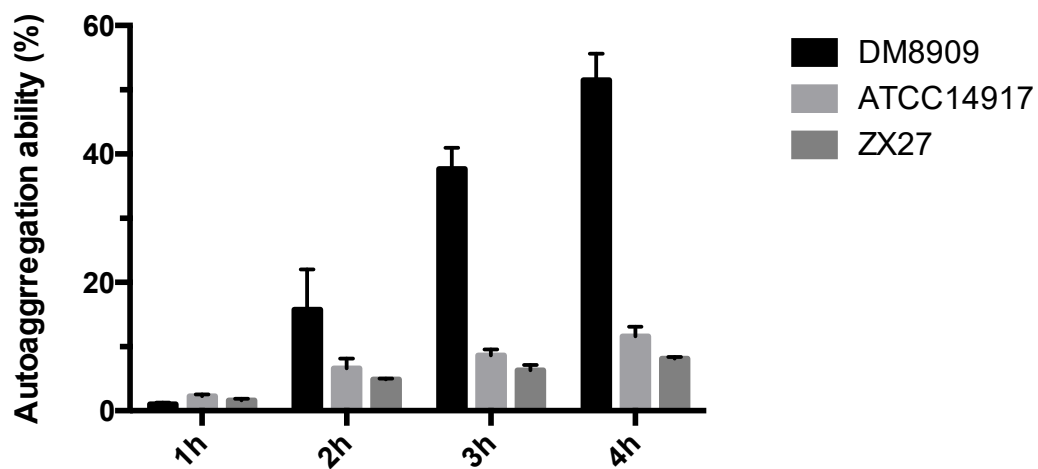

Data are expressed as the mean  $\pm$  standard deviations (S.D) (n=3).

### Supplementary Figure S2 The growth curve of the three tested *Lactobacillus* sp.

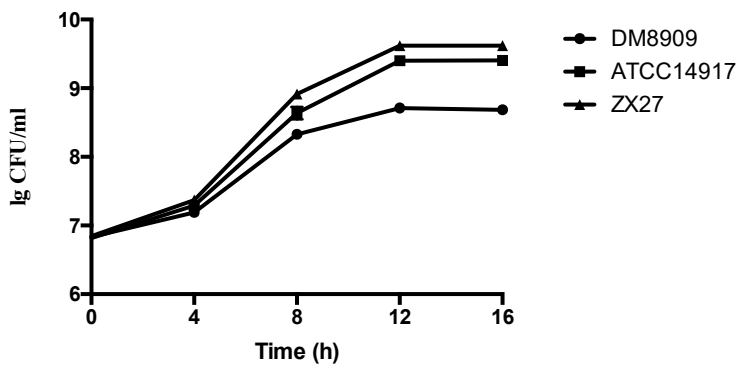

Data are expressed as the mean  $\pm$  standard deviations (S.D) (n=3).
